# Supplementary material for: Five crucial prognostic-related autophagy genes stratified female breast cancer patients aged 40–60 years
Source: PubMed Central journal article supplement (PMC8650421; doi:10.1186/s12859-021-04503-y), 2021-12-07
Supplement: 12859_2021_4503_MOESM1_ESM.pdf [file 12859_2021_4503_MOESM1_ESM.pdf]

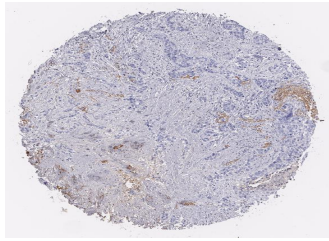

SERPINA1 tumor tissue(4x)

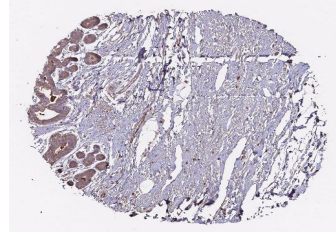

SERPINA1 normal tissue(4x)

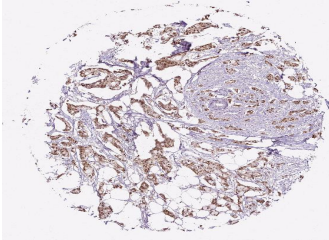

HSPA8 tumor tissue(4x)

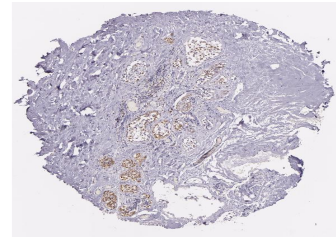

HSPA8 normal tissue(4x)

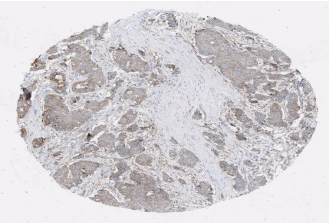

HSPB8 tumor tissue(4x)

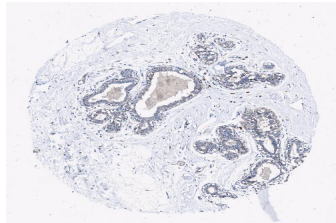

HSPB8 normal tissue(4x)

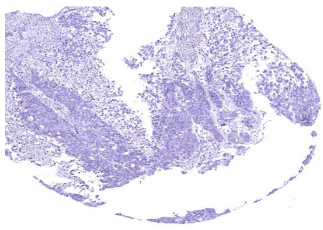

MAP1LC3A tumor tissue(4x)

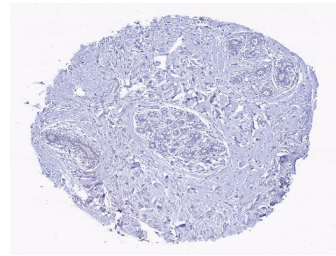

MAP1LC3A normal tissue(4x)

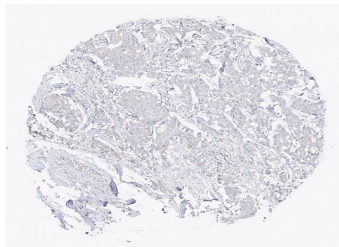

DIRAS3 tumor tissue(4x)

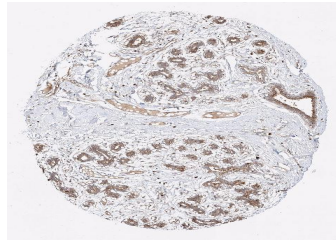

DIRAS3 normal tissue(4x)

**Figure S1 The expression of the five hub prognostic AGs on the protein level**
